# Supplementary material
Source: PubMed Central journal article supplement (PMC6451742)
Supplement: mmc3.pdf [file mmc3.pdf]

# Truncating Mutations in UBAP1 Cause Hereditary Spastic Paraplegia

Mohammad Ali Farazi Fard,<sup>1,20</sup> Adriana P. Rebelo,<sup>2,20</sup> Elena Buglo,<sup>2</sup> Hamid Nemati,<sup>6</sup> Hassan Dastsooz,<sup>1,3</sup> Ina Gehweiler,<sup>4,5</sup> Selina Reich,<sup>4,5</sup> Jennifer Reichbauer,<sup>4,5</sup> Beatriz Quintáns,<sup>12</sup> Andrés Ordóñez-Ugalde,<sup>12</sup> Andrea Cortese,<sup>2</sup> Steve Courel,<sup>2</sup> Lisa Abreu,<sup>2</sup> Eric Powell,<sup>7</sup> Matt Danzi,<sup>2</sup> Nicole B. Martuscelli,<sup>15</sup> Dana M. Bis-Brewer,<sup>2</sup> Feifei Tao,<sup>2</sup> Fariba Zarei,<sup>6</sup> Parham Habibzadeh,<sup>1,8</sup> Majid Yavarian,<sup>1</sup> Farzaneh Modarresi,<sup>9</sup> Mohammad Silawi,<sup>1</sup> Zahra Tabatabaei,<sup>1</sup> Masoume Yousefi,<sup>1</sup> Hamid Reza Farpour,<sup>6</sup> Christoph Kessler,<sup>4,5</sup> Elisabeth Mangold,<sup>16</sup> Xenia Kobeleva,<sup>17</sup> Amelie J. Mueller,<sup>18,19</sup> Tobias B. Haack,<sup>18,19</sup> Mark Tarnopolsky,<sup>10</sup> Ziv Gan-Or,<sup>11</sup> Guy A. Rouleau,<sup>11</sup> Matthis Synofzik,<sup>4,5</sup> María-Jesús Sobrido,<sup>12</sup> Albena Jordanova,<sup>13,14</sup> Rebecca Schüle,<sup>4,5,20</sup> Stephan Zuchner,<sup>2,20</sup> and Mohammad Ali Faghihi<sup>1,9,20,\*</sup>

The diagnostic gap for rare neurodegenerative diseases is still considerable, despite continuous advances in gene identification. Many novel Mendelian genes have only been identified in a few families worldwide. Here we report the identification of an autosomal-dominant gene for hereditary spastic paraplegia (HSP) in 10 families that are of diverse geographic origin and whose affected members all carry unique truncating changes in a circumscribed region of *UBAP1* (ubiquitin-associated protein 1). HSP is a neurodegenerative disease characterized by progressive lower-limb spasticity and weakness, as well as frequent bladder dysfunction. At least 40% of affected persons are currently undiagnosed after exome sequencing. We identified pathological truncating variants in *UBAP1* in affected persons from Iran, USA, Germany, Canada, Spain, and Bulgarian Roma. The genetic support ranges from linkage in the largest family (LOD = 8.3) to three confirmed *de novo* mutations. We show that mRNA in the fibroblasts of affected individuals escapes nonsense-mediated decay and thus leads to the expression of truncated proteins; in addition, concentrations of the full-length protein are reduced in comparison to those in controls. This suggests either a dominant-negative effect or haploinsufficiency. *UBAP1* links endosomal trafficking to the ubiquitination machinery pathways that have been previously implicated in HSPs, and *UBAP1* provides a bridge toward a more unified pathophysiology.

Hereditary spastic paraplegia (HSP) represents a group of genetically highly heterogeneous rare inherited neurodegenerative diseases, which are characterized by the pathological hallmark of a length-dependent degeneration of corticospinal-tract axons (see GeneReviews in [Web Resources](#)).<sup>1</sup> Clinically, HSPs are marked by progressive spastic paraparesis, although the clinical presentation encompasses a wide spectrum of phenotypes. In pure forms of HSP, progressive spasticity and weakness in the lower extremities are the main features. In complex forms of HSP, additional clinical symptoms include cataracts, ataxia, epilepsy, cognitive impairment, peripheral neuropathy, optic neuropathy, and deafness (see GeneReviews in [Web Resources](#)).<sup>1</sup> The prevalence of HSP has been estimated to be 1.3–9.6 in 100,000 (see GeneReviews in [Web](#)

[Resources](#)).<sup>1,2</sup> Thus far, at least 58 genes have been reported to cause HSP in a Mendelian fashion.<sup>3</sup> Yet approximately 40% of affected persons are still not diagnosed even after whole-exome sequencing (WES). Furthermore, many of the genes reported in recent years have only been described in a few families.<sup>4</sup>

In an effort to further close this diagnostic gap in HSP, we have gathered a highly diverse sample of 10 families from six countries (Iran, 1; USA, 1; Germany, 4; Canada, 1; Bulgaria, 2; and Spain, 1). Prior to the initiation of this study, all participating affected individuals gave informed consent in agreement with each institutional review board. In one family of Persian origin, family 1, we were able to genetically ascertain a total of 14 affected individuals from three generations ([Figure 1](#)). Sequencing of an HSP gene panel and CNV

<sup>1</sup>Persian BayanGene Research and Training Center, Shiraz, Iran; <sup>2</sup>John P. Hussman Institute for Human Genomics, Dr. John T. Macdonald Foundation Department of Human Genetics, University of Miami, Miami, FL 33136, USA; <sup>3</sup>Italian Institute for Genomic Medicine, University of Turin, Turin 10126 Italy; <sup>4</sup>Department of Neurodegenerative Diseases, Hertie-Institute for Clinical Brain Research and Center of Neurology, University of Tübingen, Tübingen 72076, Germany; <sup>5</sup>German Center for Neurodegenerative Diseases, Tübingen 72076, Germany; <sup>6</sup>Shiraz University of Medical Sciences, Shiraz, Iran; <sup>7</sup>The Genesis Project foundation Miami, FL 33136, USA; <sup>8</sup>Student Research Committee, Shiraz University of Medical Sciences, Shiraz, Iran; <sup>9</sup>Center for Therapeutic Innovation and Department of Psychiatry and Behavioral Sciences, University of Miami, Miami, FL 33136 USA; <sup>10</sup>Department of Pediatrics, McMaster University, Hamilton, Ontario L8S 4L8, Canada; <sup>11</sup>Department of Human Genetics, McGill University, Montréal, Quebec H3A 0G4, Canada; <sup>12</sup>Neurogenetics Group Instituto de Investigación Sanitaria, Hospital Clínico de Santiago, Santiago de Compostela 15706, Spain; <sup>13</sup>Molecular Neurogenetics Group VIB-UAntwerp, Center for Molecular Neurology, University of Antwerp, Antwerpen 2000, Belgium; <sup>14</sup>Molecular Medicine Center Department of Medical Chemistry and Biochemistry, Medical University, Sofia, Sofia 1431, Bulgaria; <sup>15</sup>Department of Biology University of Miami, Miami, FL 33136, USA; <sup>16</sup>Institute of Human Genetics University of Bonn, Bonn 53113, Germany; <sup>17</sup>Department of Neurology, University of Bonn, Bonn 53113, Germany; <sup>18</sup>Institute of Medical Genetics and Applied Genomics, University of Tübingen, Tübingen 72076, Germany; <sup>19</sup>Centre for Rare Diseases, University of Tübingen, Tübingen 72076, Germany

<sup>20</sup>These authors contributed equally to this work

\*Correspondence: [mfaghihi@med.miami.edu](mailto:mfaghihi@med.miami.edu)

<https://doi.org/10.1016/j.ajhg.2019.03.001>

© 2019 This is an open access article under the CC BY-NC-ND license (<http://creativecommons.org/licenses/by-nc-nd/4.0/>).

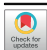

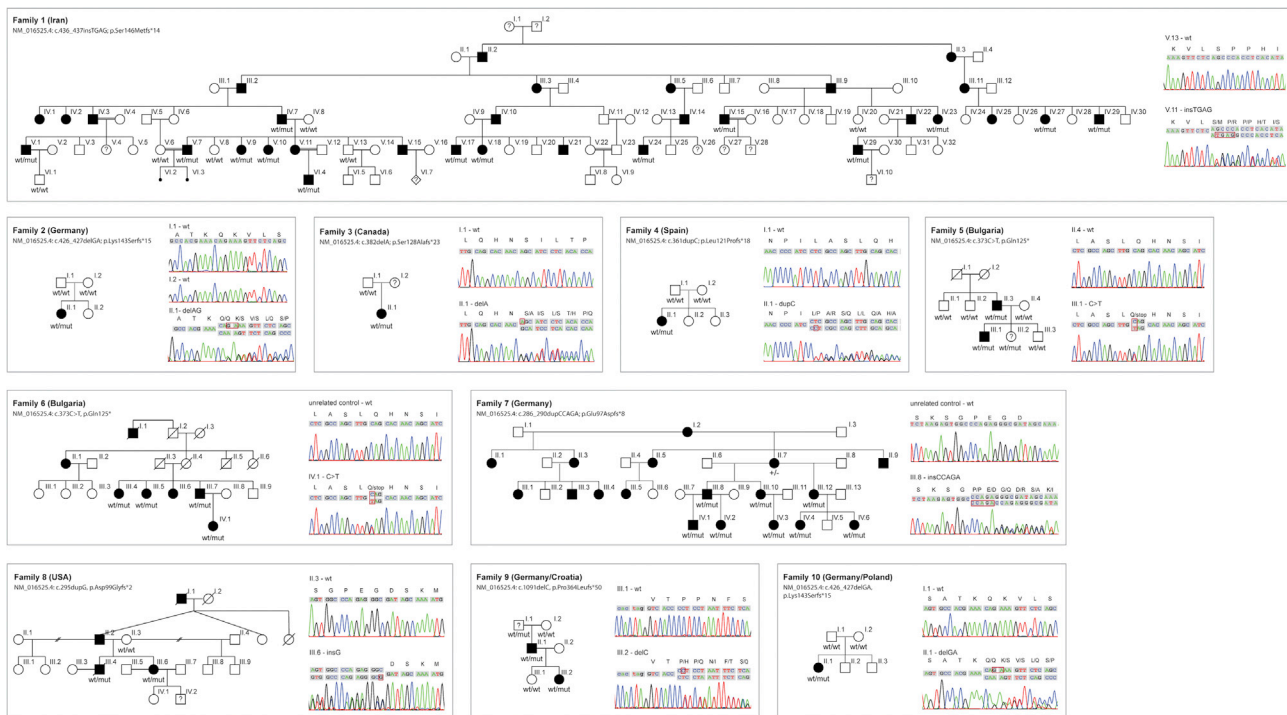

**Figure 1. Pedigrees of HSP-Affected Families with UBAP1 Truncations**

All pedigrees suggest an autosomal-dominant or a *de novo* Mendelian trait. HSP-affected individuals are marked by filled symbols; individuals with unclear affection status are marked by a question mark. “mut” depicts the presence of a causative allele. Sanger traces exemplify the confirmation of variants detected via next-generation sequencing. The penetrance of truncating UBAP1 variants is reduced: individual F5-III.2 was subjectively unaffected at age 14 but showed brisk reflexes of lower limbs, indicating potential dysfunction of the corticospinal tract. The 80-year-old grandfather of the index case in family 9 (F9-III.1) was unfortunately not available for a neurological examination but was reported to be in good health and without any indication of a gait disturbance.

analysis at the SPG4 locus were unremarkable. Subsequently, WES was performed in two affected individuals (V.1 and V.15). Bioinformatics analysis of the sequencing data used standard tools, including BWA aligner,<sup>5</sup> FreeBayes,<sup>5</sup> GATK,<sup>6</sup> and GENESIS.<sup>7</sup> Only non-synonymous variants with a minor-allele frequency of less than 0.0001 in gnomAD and in our in-house Iranian variant database (BayanGene; <http://www.bayangene.com>) of 1,500 exomes were further considered. Two heterozygous variants remained in *SVEP1* (chr9: 113137668; rs373655861; p.Thr3527Met hg19 [c.10580C>T]; GenBank: NM\_153366.3) and *UBAP1* (chr9: 34241270; GenBank: NM\_016525.4: c.436\_437insTGAG [p.Ser146Metfs\*14]), respectively. The *SVEP1* variant was ruled out by segregation studies involving Sanger sequencing of the entire pedigree. Thus, after confirmation of complete segregation, the truncating frameshift variant in ubiquitin-associated protein 1 (*UBAP1*) was considered as the causative allele in family 1 (Figure 1). This frameshift variant was not present in ExAC, gnomAD, GENESIS, nor in 1,500 Iranian genomes. It is predicted to truncate the protein at residue 158 out of 502 amino acids (GenBank: NM\_016525.4). By including the Sanger-confirmed affected and unaffected participants (Figure 1), we performed parametric two-point linkage analysis by using the LINKAGE program, which rendered a two-point LOD score of 8.25 at the position of the *UBAP1* insertion.

We then searched the GENESIS database for additional families with *UBAP1* variants. GENESIS contains more than 3,000 exomes and genomes from affected persons with HSP and related disorders.<sup>7</sup> We filtered for non-synonymous and truncating variants under an autosomal-dominant model with minor-allele frequency in gnomAD < 0.0001 and a minimum sequencing depth of 10 reads. We identified seven additional HSP families, all carrying truncating variants in *UBAP1* (Table 1). In addition, predictively truncating *UBAP1* variants were prioritized in two families (9 and 10) who underwent diagnostic exome sequencing at the University of Tuebingen. The detection of truncating alleles in all families is especially remarkable when one considers the almost complete constraint of *UBAP1* for loss-of-function (truncating) variation in the ~120,000 chromosomes in both ExAC and gnomAD,  $pLi = 0.95$  and  $0.92$ , respectively.<sup>8</sup> We calculated the probability of significant enrichment of truncating variations in *UBAP1* in our HSP dataset compared to ExAC. In the GENESIS dataset we found seven such variants in a cohort of 567 HSP samples versus 0 truncating variants in 60,000 ExAC samples ( $p = 6.187 \times 10^{-15}$  by Fisher test. Odds ratio = infinity). Five truncating variants were reported in the ~246,000 chromosomes in gnomAD, but none fell within the specific gene region containing the variants reported in this study.

**Table 1. Detailed Genomic Locations of Detected Pathogenic Variants**

| Family ID | Genome Assembly (hg19)  | Isoform 1 (GenBank: NM_016525.4)<br>Expressed in Neurons |                  | Isoform 4 (GenBank: NM_001171201.1)<br>Canonical According to NCBI |
|-----------|-------------------------|----------------------------------------------------------|------------------|--------------------------------------------------------------------|
|           |                         | cDNA                                                     | Protein          | Protein                                                            |
| 1         | chr9: 34241459–34241460 | c.436_437insTGAG                                         | p.Ser146Metfs*14 | p.Ser210Metfs*14                                                   |
| 2         | chr9: 34241449–34241450 | c.426_427delGA                                           | p.Lys143Serfs*15 | p.Lys207Serfs*15                                                   |
| 3         | chr9: 34241405–34241405 | c.382del                                                 | p.Ser128Alafs*23 | p.Ser192Alafs*23                                                   |
| 4         | chr9: 34241384–34241384 | c.361dupC                                                | p.Leu121Profs*18 | p.Leu185Profs*18                                                   |
| 5         | chr9: 34241396–34241396 | c.373C > T                                               | p.Gln125*        | p.Gln161*                                                          |
| 6         | chr9: 34241396–34241396 | c.373C > T                                               | p.Gln125*        | p.Gln161*                                                          |
| 7         | chr9: 34241309–34241313 | c.286_290dupCCAGA                                        | p.Glu97Aspfs*8   | p.Glu161Aspfs*8                                                    |
| 8         | chr9: 34241318–34241318 | c.295dupG                                                | p.Asp99Glyfs*2   | p.Asp163Glyfs*2                                                    |
| 9         | chr9: 34249784–34249784 | c.1091delC                                               | p.Pro364Leufs*50 | p.Pro428Leufs*50                                                   |
| 10        | chr9: 34241449–34241450 | c.426_427delGA                                           | p.Lys143Serfs*15 | p.Lys207Serfs*15                                                   |

We refer to isoform 1 throughout the text.

All additional variants and their segregation with disease in the additional families were confirmed by Sanger sequencing. On the basis of transcript GenBank: NM\_016525.4, the identified variants were as follows (Table 1 and Figure 1): families 2 and 10 from Germany, c.426\_427delGA (p.Lys143Serfs\*15); family 3 from Canada, c.382del (p.Ser128Alafs\*23); family 4 from Spain, c.361dupC (p.Leu121Profs\*18); families 5 and 6 from Bulgaria (Roma ethnicity), c.373C>T (p.Gln125\*); family 7 from Germany, c.286\_290dupCCAGA (p.Glu97Aspfs\*8); family 8 from the United States, c.295dupG (p.Asp99Glyfs\*2), and family 9 from Germany c.1091delC (p.Pro364Leufs\*50).

In families 2 and 4, a *de novo* occurrence of the truncating variant was confirmed (Figure 1). Families 5 and 6 were of self-declared Bulgarian Roma ethnicity and carried the same p.Gln125\* variant, although the two index participants are from reportedly unrelated families. Evaluating the prevalence of this allele in the European Roma population and in Gypsy HSP-affected persons will require further studies.

The first manifesting symptom in all 30 UBAP1 mutation carriers from 10 families for whom detailed clinical data were available was a progressive spastic-gait disorder with a median age at onset of 8 years (interquartile range 4–9 years; oldest onset age 26 years; one asymptomatic mutation carrier (F5-III.2) aged 14 years (detailed clinical information in Table S1). At the time of examination (median disease duration 28 years; interquartile range 15–36 years), lower-limb spastic paraparesis was still the most prominent clinical feature in all affected mutation carriers; this was accompanied by brisk lower-limb tendon reflexes (all carriers, including asymptomatic carrier F5-III.2) and extensor plantar response in all but the youngest affected individual (F7-IV.6). Although brisk tendon reflexes of the upper limbs were frequently present (26 of 30; 87%) significant upper-limb spasticity was seen only in a single case (1/30; 3%; F4-II.1), consistent with a length-depen-

dent axonopathy of the corticospinal tract. Urinary urgency was reported in some cases (11 of 30; 37%), sensory deficits were absent or mild, and there was no evidence of peripheral neuropathy. In the majority of families (8/10; 80%), no additional signs or symptoms indicating affection of neuronal systems other than the corticospinal tract were seen, and the disease was accordingly classified as pure HSP. In family 7, however, seven out of nine family members had features of cerebellar involvement (such features included saccadic pursuit, gaze-evoked nystagmus, dysmetric saccades, and limb ataxia), features also present in family 9 (F9-II.1), indicating that the cerebellum is vulnerable to UBAP1 dysfunction at least in some cases.

Overall, truncating UBAP1 mutations are associated with a predominantly pure early-onset HSP phenotype; cerebellar involvement seems to be clustered in families and was observed in 2/10 families. Although there is thus minimal variation in terms of system involvement across families carrying UBAP1 mutations, phenotypic variability exists regarding the progression rate; for example, the disease progressed rather rapidly and led to early wheelchair dependency in families 2, 6, and 7 but was almost non-progressive in family 9 (F9-II.1 is still able to run and walk unlimited distances after 38 years of disease duration). Both intrafamilial as well as interfamilial variability are common or even the norm in HSP.<sup>3</sup> A complete understanding of the phenotypic spectrum associated with UBAP1 mutations will require careful clinical evaluation of additional families carrying UBAP1 mutations.

UBAP1 is a member of the endosomal sorting complex required for transport -1 (ESCRT-I) complex and a regulator of vesicular trafficking processes, binds to ubiquitinated cargo proteins, and is essential for sorting endocytic ubiquitinated cargos into multivesicular bodies (MVBs).<sup>9</sup> It also plays an important role in proteasomal degradation of ubiquitinated cell-surface proteins, including EGFR (epidermal growth factor receptor) and BST2 (bone marrow

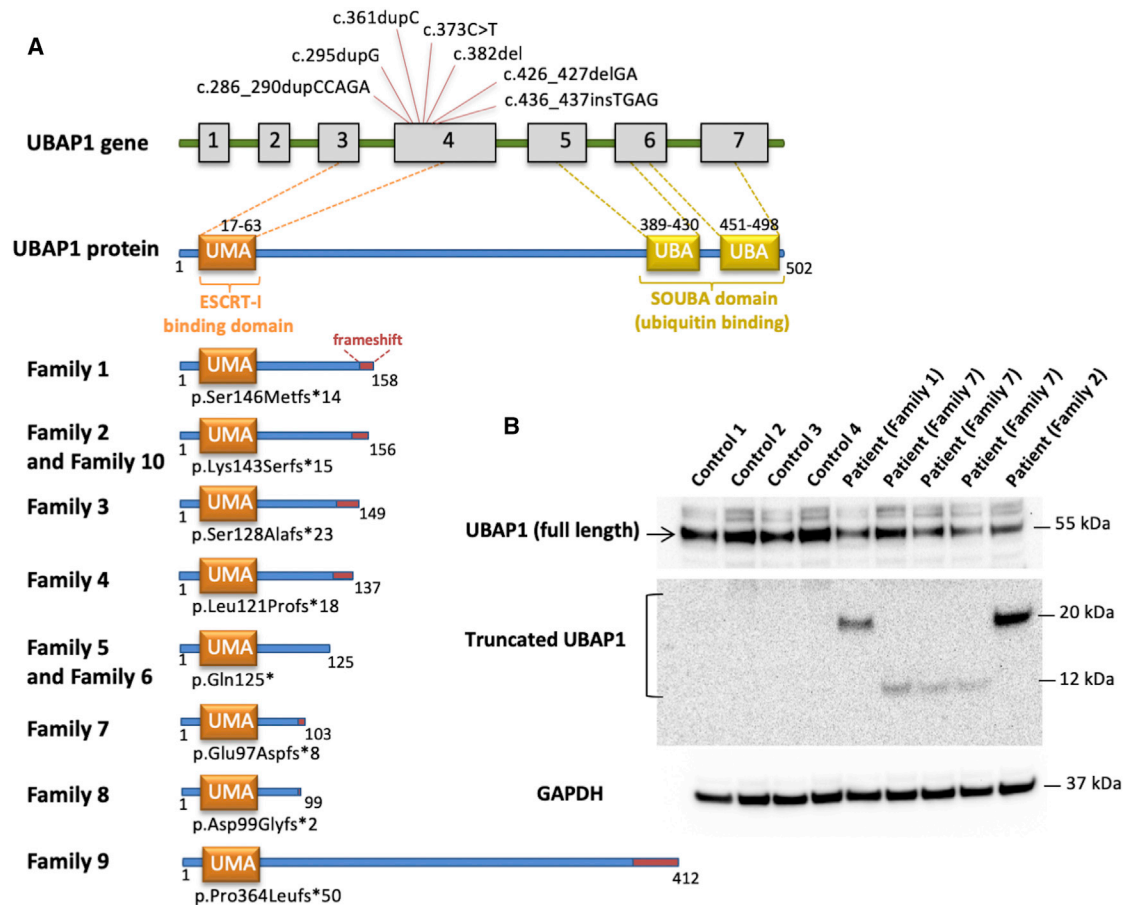

**Figure 2. The Structure of *UBAP1* and Mutations Carried by Affected Individuals**

(A) Schematic diagram showing all exons and UTRs of *UBAP1* on the basis of gene model GenBank: NM\_016525.4. The gray boxes represent the coding sequence of *UBAP1*. All variants occurred in exon 4 of *UBAP1*. The UMA protein domain includes amino acids 17–63, and two UBAs include amino acids 389–430 and 451–489. All truncations are listed below; the preserving of the UMA domain is clearly depicted, but there is loss of the two SOUBA domains.

(B) Immunoblot analysis with an antibody recognizing amino acids 25–75 of *UBAP1* shows a notable decrease in the amount of full-length *UBAP1* in fibroblasts of the affected individuals from three different families when these cells are compared to control fibroblasts. Truncated *UBAP1* of the predicted sizes was detected in fibroblasts from affected individuals but not in control fibroblasts.

stromal cell antigen 2).<sup>9</sup> *UBAP1* has two main domains: The UMA (*UBAP1*-*MVB12*-associated) domain in the N-terminal region (17–63 aa), which mediates the association with the ESCRT-I complex, and a SOUBA (solenoid of overlapping ubiquitin-associated domains) domain in the C-terminal region (389–498 aa).<sup>9,10</sup> Both domains allow *UBAP1* to act as a molecular bridge connecting the endosomal trafficking pathways to the ubiquitination machinery. In an effort to decipher the pathophysiology of *UBAP1* in HSP, we noted that all but one of the identified changes fall within a circumscribed area of the protein between Asp 99 and Ser 146; the change in family 9 at Pro364 was the only outlier (GenBank: NM\_016525.4). Interestingly, disease progression in this family has been dramatically slower than in the other families: the disease has been almost stationary over decades (see above), pointing toward a possible genotype-phenotype correlation. Yet, all changes preserve the UMA domain but cause a loss of the SOUBA domain.<sup>10</sup> It has been shown that mutagenesis of the SOUBA domain in *UBAP1* strongly reduces its interac-

tion with ubiquitinated proteins (Figure 2).<sup>10</sup> To determine whether the observed truncating variants would lead to nonsense-mediated mRNA decay and haploinsufficiency, we evaluated both the RNA and protein expression of mutant alleles. RT-PCR was performed on RNA extracted from the fibroblasts of an affected individual, and the RNA was sequenced by the Sanger method. Surprisingly, the c.436\_437insTGAG was detected in the affected person's cDNA, indicating escape of nonsense-mediated mRNA decay (Figure S1). Next, we performed immunoblot analysis to evaluate both wild-type and potential truncated mutant *UBAP1*. Total protein extracts were probed with an antibody raised against the N-terminal region of *UBAP1* (amino acids 25–75), a part of the protein preserved in mutant *UBAP1* proteins. The protein levels measured in affected individuals were compared with those in four control fibroblasts and normalized to GAPDH levels. Immunoblots showed decreased protein levels of full-length *UBAP1* in fibroblasts from affected individuals; in addition, the truncated protein was detected (Figure 2). The reduced

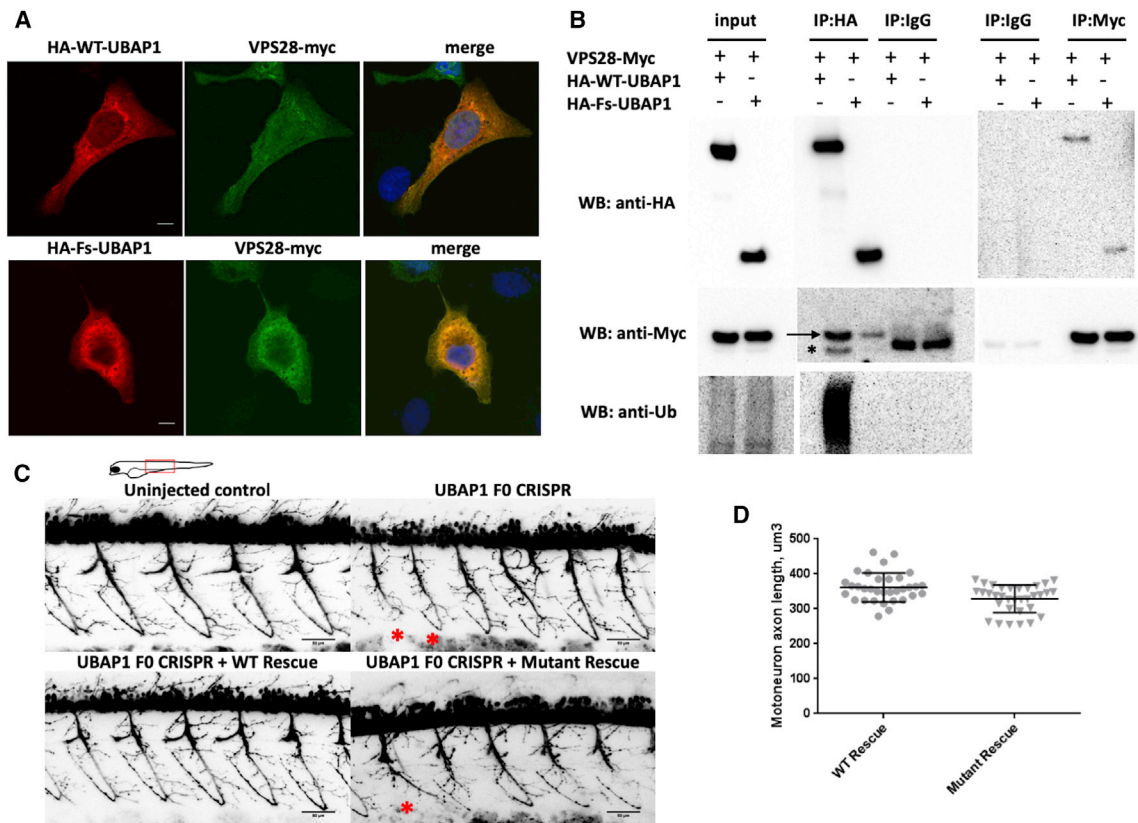

**Figure 3. Functional *In Vitro* and *In Vivo* Studies of Truncated UBAP1**

(A) Immunostaining of U2OS cells transfected with HA-WT-UBAP1 HA-Fs-UBAP1 (p.Leu121Profs\*18) and VPS-28-Myc. Both wild-type and mutant UBAP1 co-localize with VPS28-Myc.

(B) A co-immunoprecipitation assay shows protein-protein interaction between VPS28-Myc and both HA-WT-UBAP1 and HA-Fs-UBAP1. Ubiquitinated proteins co-immunoprecipitated with HA-WT-UBAP1 but not with HA-Fs-UBAP1. The arrow points to VPS28-Myc, and the asterisk below the arrow indicates the IgG band.

(C) Motor-neuron axons in *Tg(olig2::DsRed)* zebrafish embryos at 48 hpf. Embryos were injected with CRISPR Cas9 and sgRNAs against UBAP1; injection was supplemented with human RNA rescue of wild-type or truncated mutant UBAP1. Truncated and misshaped axons were more commonly observed with mutant hRNA rescue (indicated by asterisks). Scale bars represent 50  $\mu$ m. The phenotypic difference between treated groups was evaluated by a Fisher exact test. Samples were assigned to either normal or affected categories on the basis of the presence of truncated and misshaped axons. The Fisher exact statistic value was determined to be 0.003; the result is significant at  $p < 0.005$ . Statistics describing normal versus affected phenotypes were calculated on the basis of the following sample sizes (number of embryos observed as having a phenotype). F0 CRISPR + wild-type hRNA rescue: normal = 11, affected = 1. F0 CRISPR + mutant hRNA rescue (family 4, p.Leu121Profs\*18), normal = 9, affected = 15.

(D) Quantification of the individual motor-axon lengths.  $p$  values were calculated with a one-tailed Student's  $t$  test.:  $p = 0.0008$  and  $n = 9$  (number of embryos in each experimental group; four axons were measured per embryo).

concentrations of the full-length protein in fibroblasts from affected individuals compared to controls along with the presence of the truncated protein could potentially lead to haploinsufficiency and/or a dominant-negative effect. To evaluate the effects of the truncated protein, we performed site-direct mutagenesis and generated a plasmid encoding the truncated protein fused to an HA tag at the N-terminal region. U2OS cells were co-transfected with either wild-type (HA-WT-UBAP1) or a truncated mutant (HA-Fs-UBAP1; p.Leu121Profs\*18) together with its known binding partner VPS28-Myc. Both the wild-type and the truncated mutant co-localize with VPS28 (Figure 3A). This suggests that interaction with the ESCRT-I complex is preserved; however, the lack of the SOUBA domain, essential for ubiquitin binding, would be detrimental. Interestingly, overexpression of truncated

protein containing the UMA domain has been shown to result in a dominant-negative effect by inhibiting HIV-1 budding.<sup>10</sup> It is thus possible that expression of the truncated protein in affected persons could cause a dominant-negative effect due to arrest of the ESCRT-complex without acquiring the ubiquitinated protein cargo.

We performed a co-immunoprecipitation (co-IP) assay to confirm the interaction between HA-Fs-UBAP1 and VPS28-Myc. HEK293T cells were co-transfected with VPS28-Myc and with either HA-WT-UBAP1 or HA-Fs-UBAP1 and immunoprecipitated with an anti-HA or an anti-Myc antibody and analyzed by immunoblot. Our results show that both wild-type and truncated UBAP1 co-immunoprecipitated with VPS28, confirming protein-protein interaction (Figure 3B). However, ubiquitinated proteins were co-immunoprecipitated with the HA-WT-UBAP1 but not

with HA-Fs-UBAP1. It has previously been shown that siRNA depletion of UBAP1 in HeLa cells causes clustering of early-endosome accumulation of ubiquitinated proteins and enlargement and clustering of LAMP1-positive late endosomes and lysosomes.<sup>9</sup> In fibroblasts of affected persons carrying UBAP1 mutations, however, none of these changes could be observed (Figure S2), even after exposure of cells to stress conditions. It therefore appears unlikely that loss of one *UBAP1* allele results in the gross failure of multivesicular body sorting.

To investigate the effects of the truncated protein *in vivo*, we generated a zebrafish model with *UBAP1* knockdown. We used a transgenic fish with fluorescently labeled motoneuron Tg(*olig2::DsRed*).<sup>11</sup> Embryos were injected with CRISPR Cas9 and sgRNAs against *UBAP1* supplemented with human RNA rescue of either wild-type or truncated mutant UBAP1. At 48 hours post-fertilization (hpf), embryos were imaged *in vivo* with a confocal microscope. We observed significantly more truncated and misshaped axons in the mutant rescued embryos than in the wild-type rescued embryos (Figure 3C). Motoneuron axon lengths in the truncated mutant were significantly ( $p = 0.0008$ ) shorter than those of the wild-type (Figure 3D). This result supports the pathogenic effects of the truncated protein *in vivo*.

In summary, we present strong genetic evidence that truncating mutations in *UBAP1* cause a relatively frequent form of HSP. *UBAP1* mutations were identified in a large Iranian kindred as well as in nine additional families with different ancestral backgrounds, including Bulgarian Roma, North American of European descent, German, Spanish, and Quebecois. All available affected persons in these families carried the respective mutation in *UBAP1*, although *UBAP1* has a strong loss-of-function constraint in the 60,000 individuals studied in the ExAC dataset. In two families we were also able to show a *de novo* occurrence of the variants. In our dataset of 567 families affected by dominant HSP, *UBAP1* accounts for 1.2% of cases. Evaluating the full allelic and clinical spectrum in this gene will require further studies. Because UBAP1 links two cellular pathways previously involved in HSP, this finding consolidates our current understanding of the pathophysiology of HSP and points to potential novel drug targets.

### Supplemental Data

Supplemental Data can be found online at <https://doi.org/10.1016/j.ajhg.2019.03.001>.

### Acknowledgments

We are thankful to the families who participated in this research. We thank Els De Vriendt for the excellent technical assistance. S.Z. and R.S. are supported by National Institutes of Health grant R01NS072248. The project was further supported by the European Union's Horizon 2020 research and innovation program under grant 779257 (Solve-RD; R.S.) and in the context of the ERA-NET Cofund action N° 643578 by the German Bundesministerium für Bildung und Forschung (BMBF) (01GM1607) for the E-Rare-3

network PREPARE (M.S., S.R., and associated partner S.Z.). M.J.S. was supported by Instituto de Salud Carlos III grant PS09/01830 and FEDER (Fonds Européen de Développement Économique et Régional). A.J. is supported by an Excellence (TOP) grant of the University of Antwerp. The study was partly supported by NIMAD research grant (940714) awarded to MAF. The views expressed are those of the author(s) and not necessarily those of the National Health Service, the National Institute for Health Research, or the Department of Health. T.B.H. was supported by the BMBF through the "Juniorverbund in der Systemmedizin" "mitOmics" (FKZ 01ZX1405C to T.B.H.).

### Declaration of Interests

The authors declare no competing interests.

Received: December 9, 2018

Accepted: February 27, 2019

Published: March 28, 2019

### Web Resources

OMIM, [www.omim.org](http://www.omim.org)

GENESIS platform, <https://www.tgp-foundation.org/>

GeneReviews, Fink, J.K. (1993). Hereditary Spastic Paraplegia Overview, <https://www.ncbi.nlm.nih.gov/books/NBK1509/>

### References

1. Fink, J.K. (2013). Hereditary spastic paraplegia: Clinico-pathologic features and emerging molecular mechanisms. *Acta Neuropathol.* 126, 307–328.
2. Parodi, L., Fenu, S., Stevanin, G., and Durr, A. (2017). Hereditary spastic paraplegia: More than an upper motor neuron disease. *Rev. Neurol. (Paris)* 173, 352–360.
3. Schüle, R., Wiethoff, S., Martus, P., Karle, K.N., Otto, S., Klebe, S., Klimpe, S., Gallenmüller, C., Kurzwelly, D., Henkel, D., et al. (2016). Hereditary spastic paraplegia: Clinicogenetic lessons from 608 patients. *Ann. Neurol.* 79, 646–658.
4. Bis-Brewer, D.M., and Züchner, S. (2018). Perspectives on the genomics of HSP beyond Mendelian inheritance. *Front. Neurol.* 9, 958.
5. Li, H., and Durbin, R. (2009). Fast and accurate short read alignment with Burrows-Wheeler transform. *Bioinformatics* 25, 1754–1760.
6. McKenna, A., Hanna, M., Banks, E., Sivachenko, A., Cibulskis, K., Kernytsky, A., Garimella, K., Altshuler, D., Gabriel, S., Daly, M., and DePristo, M.A. (2010). The Genome Analysis Toolkit: a MapReduce framework for analyzing next-generation DNA sequencing data. *Genome Res.* 20, 1297–1303.
7. Gonzalez, M., Falk, M.J., Gai, X., Postrel, R., Schüle, R., and Zuchner, S. (2015). Innovative genomic collaboration using the GENESIS (GEM.app) platform. *Hum. Mutat.* 36, 950–956.
8. Lek, M., Karczewski, K.J., Minikel, E.V., Samocha, K.E., Banks, E., Fennell, T., O'Donnell-Luria, A.H., Ware, J.S., Hill, A.J., Cummings, B.B., et al.; Exome Aggregation Consortium (2016). Analysis of protein-coding genetic variation in 60,706 humans. *Nature* 536, 285–291.
9. Stefani, F., Zhang, L., Taylor, S., Donovan, J., Rollinson, S., Doyotte, A., Brownhill, K., Bennion, J., Pickering-Brown, S.,

- and Woodman, P. (2011). UBAP1 is a component of an endosome-specific ESCRT-I complex that is essential for MVB sorting. *Curr. Biol.* *21*, 1245–1250.
10. Agromayor, M., Soler, N., Caballe, A., Kueck, T., Freund, S.M., Allen, M.D., Bycroft, M., Perisic, O., Ye, Y., McDonald, B., et al. (2012). The UBAP1 subunit of ESCRT-I interacts with ubiquitin via a SOUBA domain. *Structure* *20*, 414–428.
11. Kucenas, S., Snell, H., and Appel, B. (2008). nkx2.2a promotes specification and differentiation of a myelinating subset of oligodendrocyte lineage cells in zebrafish. *Neuron Glia Biol.* *4*, 71–81.

## Supplemental Data

### Truncating Mutations in UBAP1

#### Cause Hereditary Spastic Paraplegia

Mohammad Ali Farazi Fard, Adriana P. Rebelo, Elena Buglo, Hamid Nemati, Hassan Dastsooz, Ina Gehweiler, Selina Reich, Jennifer Reichbauer, Beatriz Quintáns, Andrés Ordóñez-Ugalde, Andrea Cortese, Steve Courel, Lisa Abreu, Eric Powell, Matt Danzi, Nicole B. Martuscelli, Dana M. Bis-Brewer, Feifei Tao, Fariba Zarei, Parham Habibzadeh, Majid Yavarian, Farzaneh Modarresi, Mohammad Silawi, Zahra Tabatabaei, Masoume Yousefi, Hamid Reza Farpour, Christoph Kessler, Elisabeth Mangold, Xenia Kobeleva, Amelie J. Mueller, Tobias B. Haack, Mark Tarnopolsky, Ziv Gan-Or, Guy A. Rouleau, Matthis Synofzik, María-Jesús Sobrido, Albena Jordanova, Rebecca Schüle, Stephan Zuchner, and Mohammad Ali Faghihi



## Supplementary Material

### Figures and Legends

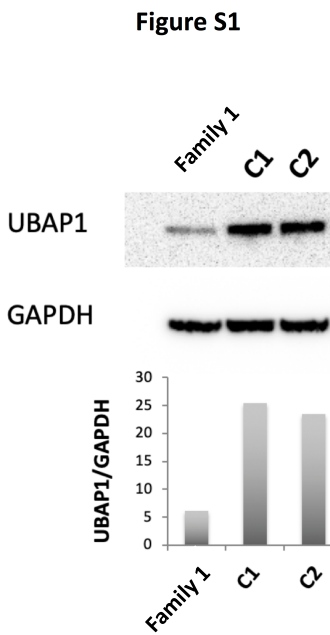

**Figure S1.** RT-PCR of a patient (Family 1) and two controls (C1, C2) from fibroblasts indicate that truncated UBAP1 mRNA escapes nonsense mediated decay.

**Figure S2**

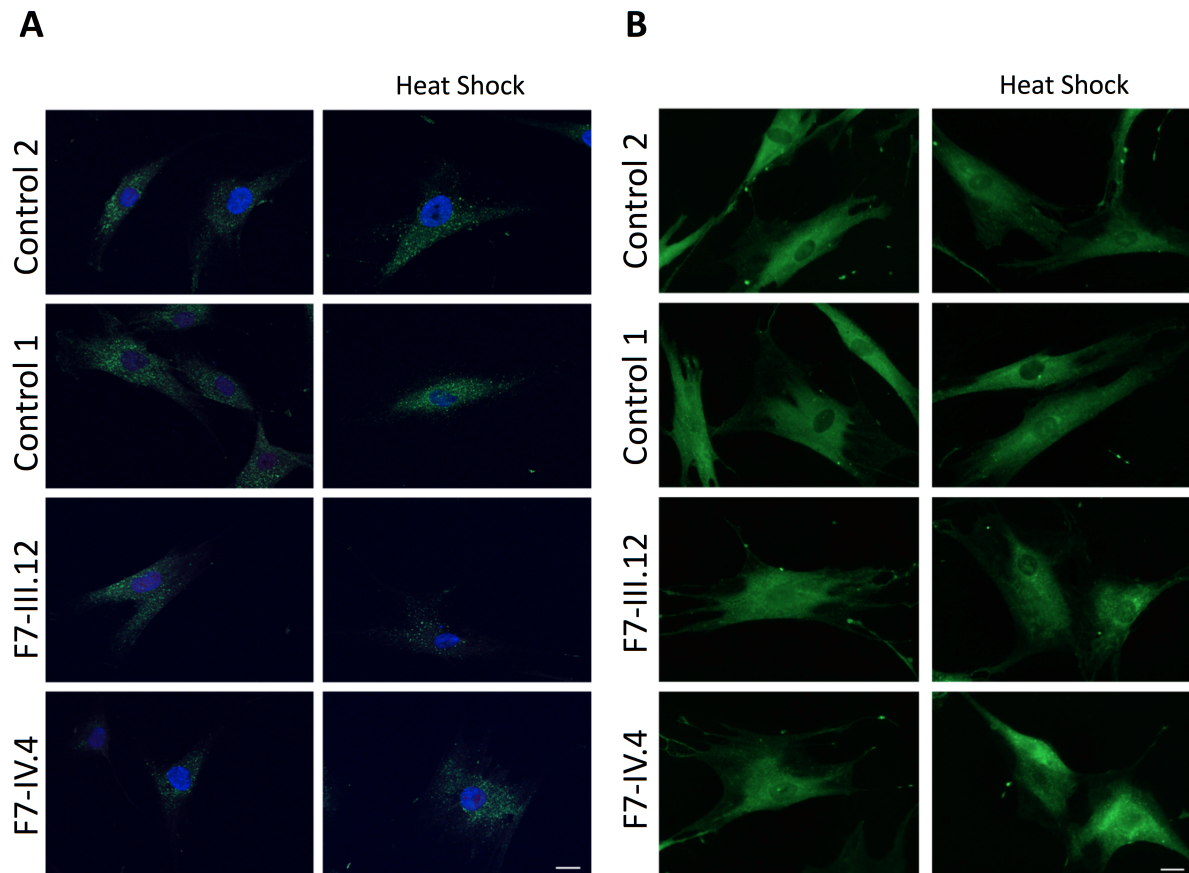

**Figure S2. Patient fibroblast immunohistochemistry studies in family 7.**

(A) Immunofluorescence staining of control and patient fibroblast lines with LAMP1 antibody under normal conditions (left) as well as after heat shock (right). Nuclei were stained with DAPI, scale bar 20µm.

(B) Immunofluorescence staining of control and patient fibroblast lines with Ubiquitin (FK2) antibody under normal conditions (left) as well as after heat shock (right). Scale bar 20µm.

## **Material and Methods**

### *Subjects and Family Members*

All affected cases studied were from non-consanguineous and unrelated families. All families gave written informed consent, and the study protocol was approved by the institutional review board of the participating institutions. Patients were clinically evaluated by Neurologists.

### *Whole-Exome Sequencing*

Whole-exome sequencing was performed in the seven index individuals with autosomal-dominant HSP. The SureSelect Human All Exon Kit (Agilent) was used for in-solution enrichment, and the HiSeq 2500 instrument (Illumina) was used to produce 100 bp paired-end sequence reads. The Burrows-Wheeler aligner and Freebayes were used for sequence alignment and variant calling. Exome data were uploaded into the GENESIS software and analyzed with strict filtering approach for heterozygous variants. Sanger sequencing confirmed segregation of the loss-of-function variants detected by whole-exome sequencing in the seven HSP families.

### *Western Blot*

Fibroblasts from affected individual from family [1](#) were cultured and cell lysates were collected for Western blot analysis. The following antibodies were used to detect UBAP1 and GAPDH: Rabbit polyclonal anti-UBAP1 antibody (Abcam) and mouse monoclonal GAPDH antibody (Santa Cruz).

### *Reverse Transcription Polymerase Chain Reaction (RT-PCR) and Sanger Sequencing*

Total RNA was isolated from patient's fibroblast using the RNeasy Plus Mini Kit (Qiagen). cDNA was synthesized from purified RNA with the SuperScript™ III First-Strand Synthesis SuperMix (ThermoFisher). Primers were used to amplify mutation site including exons 4 and 5 and flanking

intronic region: 5'-CCACAATGCCACCTCCTAT-3' (forward) and 5'-AGAATAGGCCTGGGGACA-3' (reverse). Polymerase chain reaction (PCR) was performed with Platinum Taq (ThermoFisher) and PCR products were purified with the PCR purification kit (Qiagen). Sanger sequencing was performed by Eurofins Genomics, and trace files were analyzed with the Sequencher software.

#### *Plasmids transfection and immunofluorescence*

Plasmid encoding open-reading frame of UBAP1 transcript 1 (NM\_016525.4) fused with a 3X-HA tag in the N-terminus end of the protein was obtained from Genecopoeia. Plasmid encoding VPS28 transcript (NM\_016208.3) fused to a Myc tag at the C-terminus region was also obtained from Genecopoeia. Site-direct-mutagenesis was performed to generate frameshift mutation (HA-FS-UBAP1) corresponding to variant c.361dupC (p.Leu121Profs\*18). One base insertion was introduced by PCR using the Q5 Site-Direct Mutagenesis kit (NEB). U2OS cells were transfected with Lipofectamine 3000. Cells were plated on cover slips and immunostained with anti-HA and anti-myc (Cell signaling) and fluorescent antibodies, Alexa fluor 488 and Alexa fluor 555 (Invitrogen). Cells were imaged by confocal microscopy (LSM710).

#### *Co-immunoprecipitations*

HEK293T cells were transiently transfected with VPS28-Myc and HA-WT-UBAP1 or HA-Fs-UBAP1. After 24hrs cells were harvested in IP lysis/wash buffer (ThermoFisher) and incubated on ice for 5 minutes. Cell debris was removed by centrifugation (13,000g). Co-immunoprecipitation was performed according to manufacturer's protocol. Briefly, Antibodies (HA, Myc and IgG) were incubated with magnetic Dynabeads (ThermoFisher) for 10 minutes and cell lysates were incubated with the dynabeads-antibody complex for 10 minutes. Dynabeads were washed three times with washing buffer and eluted with elution buffer.

### *Zebrafish husbandry*

Experiments were carried out using transgenic stain Tg(olig2::DsRed).<sup>1</sup> Adults were kept on a 14-h light/10-h dark cycle at 28 °C. Embryos were collected from natural crosses after removing a divider at the beginning of the light cycle. Embryos were raised in Petri dishes in the system water at 28 °C under standard conditions. All experiments were conducted in accordance with University of Miami Institutional Animal Care and Use Committee guidelines. For live imaging embryos were anesthetized at 48 hpf with 0.02% tricaine methanesulfonate (Sigma).

### *sgRNA design and synthesis*

sgRNAs were chosen among top targets with NGG PAM sites generated by the CHOPCHOP software (<http://chopchop.cbu.uib.no/>) with zero predicted off-targets with at least three mismatches in the 20-mer. The target exons chosen were exon 4 and exon 7 (two guides per exon). sgRNAs were generated by the oligonucleotide assembly method as described in Varshney *et al.*<sup>2</sup> RNAs were synthesized using the HiScribe™ T7 Quick High Yield RNA Synthesis Kit (New England Biolabs) with an incubation time of 12 h for the *in vitro* transcription reaction. RNAs were purified with the RNA Clean & Concentrator™-5 kit (Zymo Research) and eluted with 15 µl water and diluted to working concentrations ~ 200 pg/µl. F

### *hRNA rescue synthesis*

hRNA was synthesized from plasmid encoding wild-type and truncated mutant UBAP1 ([family 4, p.Leu121Profs\\*18](#)) using mMessage mMachine™ T7 Ultra kit (Invitrogen).

### *Microinjections*

Microinjections were performed into embryos at one-cell stage. Cas9 protein (PNA Bio) and pooled sgRNA were mixed with 1% Fast Green dye (Sigma) and incubated for 5 min at 37 degrees Celsius. For the rescue injections mixtures were supplemented with either wild-type or mutant synthesized human RNA (hRNA). Approximately 1.5 nL of active sgRNA-Cas9 ribonucleoprotein complex plus hRNA were injected per embryo into the cell. The final amounts injected per embryo approximately were: 350 pg of Cas9 protein; 150 pg of sgRNA pool, 50 pg of hRNA. At least three independent injection experiments were performed with spawns from different founder fish.

### *In vivo imaging of motor neurons*

Motoneuron outgrowth was assayed at 48 h.p.f. Live fish were dechorionated by tweezers and anesthetized with tricaine methanesulfonate, embedded in 1% low-melting point agarose and imaged using a Leica confocal microscope with a 20× air lens. 1- $\mu$ m z stacks were imaged between myotome segments 6 and 13, and the motoneuron morphology was evaluated for its normal shape and outgrowth trajectory.<sup>3</sup> Images were processed with Fiji software (ImageJ). LUT:edges was used to generate the figure.

### *CRISPR efficiency testing by Fragment analysis*

Embryos were euthanized and DNA was extracted using 50 mM NaOH digestion at 95 degrees Celsius for 20 min. DNA then was used to run Fluorescent PCR as described in Varshney *et al.*<sup>2</sup> The reaction products were run on a Genetic Analyser 3130xl using POP-7 polymer and analyzed for the disruption of the wild-type peaks as described in Carrington *et al.*<sup>4</sup>

### *Statistical analysis*

Images from three separate experiments were blindly evaluated for qualitative inclusion into either “normal” group or “affected” group. The normal group was assigned to images with motor axons shaped into normal hooks as in images of uninjected controls. The affected group was assigned to images with any amount of drastically misshaped or truncated axons. The Fisher exact test was performed for these two groups comparing the wild-type rescue injected group with the mutant rescue group. Differences in the number of observations were considered significant at  $p \leq 0.05$ . To quantify the motoneuron axon length the Simple Neurite Tracer plugin in Fiji was used for tracing.<sup>5</sup> Four axons per sample embryo from the same area closer to the yolk were traced, and the statistical comparison was performed by using one-tailed Student’s t test with the p-value considered significant under  $p \leq 0.005$ .

### **References**

1. Kucenas, S., Snell, H., and Appel, B. (2008). *nkx2.2a* promotes specification and differentiation of a myelinating subset of oligodendrocyte lineage cells in zebrafish. *Neuron Glia Biol.* 4, 71–81.
2. Varshney, G.K., Pei, W., LaFave, M.C., Idol, J., Xu, L., Gallardo, V., Carrington, B., Bishop, K., Jones, M., Li, M., et al. (2015). High-throughput gene targeting and phenotyping in zebrafish using CRISPR/Cas9. *Genome Research* 25, 1030–1042.
3. Myers, P.Z., Eisen, J.S., and Westerfield, M. (1986). Development and axonal outgrowth of identified motoneurons in the zebrafish. *Journal of Neuroscience* 6, 2278–2289.
4. Carrington, B., Varshney, G.K., Burgess, S.M., and Sood, R. (2015). CRISPR-STAT: an easy and reliable PCR-based method to evaluate target-specific sgRNA activity. *Nucleic Acids Res.* 43, e157–e157.
5. Abrams, A.J., Hufnagel, R.B., Rebelo, A., Zanna, C., Patel, N., Gonzalez, M.A., Campeanu, I.J., Griffin, L.B., Groenewald, S., Strickland, A.V., et al. (2015). Mutations in *SLC25A46*, encoding a UGO1-like protein, cause an optic atrophy spectrum disorder. *Nat. Genet.* 47, 926–932.
